# Supplementary material for: Evolution of impulsive–compulsive behaviors and cognition in Parkinson’s disease
Source: Springer Nature journal article supplement (doi:10.1007/s00415-019-09584-7), 2019-10-18
Supplement: MOESM1 [file 17288860]

**Online resources for “Evolution of impulsive compulsive behaviors and cognition in Parkinson’s disease”, *Journal of Neurology*, Aleksander H. Erga<sup>a\*</sup>; Guido Alves<sup>a,b,c</sup>; Ole Bjørn Tysnes<sup>d,e</sup>; Kenn Freddy Pedersen<sup>a,b</sup>**

<sup>a</sup> The Norwegian Centre for Movement Disorders, Stavanger University Hospital, Stavanger, Norway

<sup>b</sup> Department of Neurology, Stavanger University Hospital, Stavanger, Norway

<sup>c</sup> Department of Chemistry, Bioscience and Environmental Engineering, University of Stavanger, Stavanger, Norway

<sup>d</sup> Department of Clinical Medicine, University of Bergen, Bergen Norway

<sup>e</sup> Department of Neurology, Haukeland University Hospital, Bergen, Norway

\* Correspondance to [aleksander.erga@sus.no](mailto:aleksander.erga@sus.no)

### **Online resource 1**

**Title** Flow chart of patients with PD and controls in the Norwegian ParkWest study

**Footnotes:** PD=Parkinson’s disease; PwP=People with Parkinson’s disease; QUIP= Questionnaire of Impulsive and Compulsive behaviors in Parkinson’s disease.

**Initial assessment of ICBs in ParkWest**

People with PD  
(N=124)

Controls  
(N=156)

Withdrew (N=2)  
Died (N=7)

Dementia (N=9)

Missing QUIP  
(N=1)

Withdrew (N=8)  
Died (N=6)

Dementia (N=4)

Missing QUIP  
(N=2)

**Two year follow up**

PwP  
(N=105)

Controls  
(N=136)

Withdrew (N=1)  
Died (N=7)

Dementia (N=16)

Missing QUIP  
(N=0)

Withdrew (N=1)  
Died (N=5)

Dementia (N=1)

Missing QUIP  
(N=3)

**Four year follow up**

PwP  
(N=82)

Controls  
(N=126)

**Online Resource 2.** Frequencies of individual ICBs in PwP over four year follow up

| ICB type            | Baseline<br>(N=124) | 2-year follow<br>up (N=105) | 4-year follow<br>up (N=82) |
|---------------------|---------------------|-----------------------------|----------------------------|
| Gambling            | 2 (1.6)             | 4 (3.8)                     | 2 (2.4)                    |
| Hypersexuality      | 7 (5.6)             | 6 (5.7)                     | 4 (4.9)                    |
| Compulsive shopping | 14 (11.3)           | 11 (10.5)                   | 2 (2.4)                    |
| Compulsive eating   | 6 (4.8)             | 8 (7.6)                     | 4 (4.9)                    |
| Hobbyism            | 13 (10.5)           | 15 (14.3)                   | 8 (9.8)                    |
| Punding             | 12 (9.7)            | 11 (10.5)                   | 6 (7.3)                    |
| Walkabout           | 5 (4.0)             | 3 (2.9)                     | 1 (1.2)                    |
| DDS                 | 3 (2.4)             | 6 (5.7)                     | 2 (2.4)                    |

Abbreviations: ICBs=Impulsive and compulsive behaviors; PwP=Patients with Parkinson's disease.

All number are N (%).

**Online Resource 3.** Evolution of ICB symptoms in PD patients over 2 and 4 years of follow-up

| Characteristics     | 4-year follow up (N=82) |          |         |         | 2-year follow up (N=23) |          |         |
|---------------------|-------------------------|----------|---------|---------|-------------------------|----------|---------|
|                     | No. (%)                 | Baseline | 2 years | 4 years | No (%)                  | Baseline | 2 years |
| Never ICBs          | 39 (47.6)               | 0        | 0       | 0       | 13 (56.5)               | 0        | 0       |
| Non-persistent ICBs | 7 (8.5)                 | x        | x       | 0       | 2 (8.7)                 | x        | 0       |
|                     | 3 (3.7)                 | x        | 0       | x       |                         |          |         |
|                     | 11 (13.4)               | x        | 0       | 0       |                         |          |         |
|                     | 7 (8.5)                 | 0        | x       | 0       |                         |          |         |
| Persistent ICBs     | 4 (4.9)                 | 0        | x       | x       | 4 (17.4)                | x        | x       |
|                     | 6 (7.3)                 | x        | x       | x       |                         |          |         |
| Uncategorized ICBs  | 5 (6.1)                 | 0        | 0       | x       | 4 (17.4)                | 0        | x       |

**Online Resource 4.** Results from mixed linear regression models for 4 cognitive domains.

In mixed linear regression models, change in MMSE scores was associated with male gender (B=-1.13, 95 % CI -1.81 – -0.43; P=0.002), higher age (B=-0.09, 95 % CI -0.13 – -0.06; P<0.001) and DA use (1.51, 95 % CI 0.9 – 2.1, P<0.001), but not ICB status. Change in POMP scores for the executive domain was associated with male gender (B=-9.71, 95 % CI -12.72 – -6.70; P<0.001), higher age (B=-0.85, 95 % CI -1.02 – -0.66; P<0.001), follow-up time (B=-2.04, 95 % CI -3.65 – -0.43, P=0.013) and DA use (B=6.21, 95 % CI 3.2 – 9.3, P<0.001), but not ICB status. Change in POMP scores for the attention domain was associated with male gender (B=-12.5, 95 % CI -15.48 – -9.61; P<0.001), higher age (B=-0.65, 95 % CI -0.82 – -0.48; P<0.001) and DA use (5.94, 95 % CI 3.0 – 8.9, P<0.001), but not ICB status. Change in POMP scores for the visuospatial domain was associated with high age (B=-0.54, 95 % CI -0.75 – -0.34; P<0.001), but not ICB status. Lastly, change in POMP scores for the verbal memory domain was associated with male gender (B=-9.71, 95 % CI -12.72 – -6.70; P<0.001), high age (B=-1.10, 95 % CI -1.35 – -0.84; P<0.001), follow-up time (B=-2.56, 95 % CI -5.09 – -0.04, P=0.046), PD duration (B=2.18, 95 % CI 0.87 – 3.49, P=0.001) and DA use (B=8.40, 95 % CI 3.8 – 13.0, P<0.001), but not ICB status.
